# Supplementary material
Source: PubMed Central journal article supplement (PMC8045468)
Supplement: NIHMS1596912-supplement-1.pdf [file NIHMS1596912-supplement-1.pdf]

Table S1. Full factorial model effect estimates and hypothesis tests

| Effect                       | Estimate | <i>t</i> | <i>p</i> | 95%<br>Confidence<br>Interval |
|------------------------------|----------|----------|----------|-------------------------------|
| <b>Baseline</b>              |          |          |          |                               |
| Intercept                    | 91.093   | 114.382  | 0.000    | 89.529, 92.658                |
| Cohort                       | -2.170   | -1.899   | 0.058    | -4.414, 0.075                 |
| Coaching <sup>0</sup>        | -0.106   | -0.185   | 0.853    | -1.227, 1.016                 |
| PCP <sup>0</sup>             | 0.796    | 1.393    | 0.164    | -0.326, 1.917                 |
| Text <sup>0</sup>            | 0.242    | 0.423    | 0.672    | -0.880, 1.363                 |
| Meal <sup>0</sup>            | -1.114   | -1.951   | 0.052    | -2.236, 0.008                 |
| Buddy <sup>0</sup>           | 0.464    | 0.813    | 0.417    | -0.658, 1.586                 |
| <b>3-Months</b>              |          |          |          |                               |
| Time                         | -3.761   | -25.237  | 0.000    | -4.054, -3.468                |
| Time×Coaching                | 0.061    | 0.406    | 0.685    | -0.232, 0.353                 |
| Time×PCP                     | -0.076   | -0.509   | 0.611    | -0.369, 0.217                 |
| Time×Text                    | -0.047   | -0.317   | 0.751    | -0.340, 0.246                 |
| Time×Meal                    | 0.004    | 0.024    | 0.981    | -0.289, 0.296                 |
| Time×Buddy                   | -0.282   | -1.891   | 0.059    | -0.575, 0.011                 |
| Time×Coaching×PCP            | -0.045   | -0.306   | 0.759    | -0.337, 0.246                 |
| Time×Coaching×Text           | 0.002    | 0.012    | 0.991    | -0.290, 0.293                 |
| Time×Coaching×Meal           | 0.007    | 0.050    | 0.960    | -0.284, 0.299                 |
| Time×Coaching×Buddy          | -0.077   | -0.516   | 0.606    | -0.368, 0.215                 |
| Time×PCP×Text                | -0.130   | -0.878   | 0.380    | -0.422, 0.161                 |
| Time×PCP×Meal                | 0.109    | 0.737    | 0.461    | -0.182, 0.401                 |
| Time×PCP×Buddy               | -0.149   | -1.006   | 0.315    | -0.441, 0.142                 |
| Time×Text×Meal               | 0.168    | 1.132    | 0.258    | -0.124, 0.460                 |
| Time×Text×Buddy              | 0.142    | 0.958    | 0.339    | -0.150, 0.434                 |
| Time×Meal×Buddy              | 0.035    | 0.233    | 0.816    | -0.257, 0.326                 |
| Time×Coaching×PCP×Text       | -0.144   | -0.971   | 0.332    | -0.436, 0.148                 |
| Time×Coaching×PCP×Meal       | 0.208    | 1.402    | 0.162    | -0.084, 0.500                 |
| Time×Coaching×PCP×Buddy      | 0.173    | 1.168    | 0.243    | -0.118, 0.465                 |
| Time×Coaching×Text×Meal      | 0.013    | 0.085    | 0.932    | -0.279, 0.304                 |
| Time×Coaching×Text×Buddy     | -0.006   | -0.039   | 0.969    | -0.297, 0.286                 |
| Time×Coaching×Meal×Buddy     | 0.020    | 0.138    | 0.891    | -0.271, 0.312                 |
| Time×PCP×Text×Meal           | -0.087   | -0.587   | 0.557    | -0.379, 0.205                 |
| Time×PCP×Text×Buddy          | 0.281    | 1.894    | 0.059    | -0.010, 0.573                 |
| Time×PCP×Meal×Buddy          | 0.036    | 0.242    | 0.809    | -0.256, 0.328                 |
| Time×Text×Meal×Buddy         | -0.048   | -0.321   | 0.748    | -0.339, 0.244                 |
| Time×Coaching×PCP×Text×Meal  | 0.195    | 1.317    | 0.189    | -0.096, 0.487                 |
| Time×Coaching×PCP×Text×Buddy | -0.150   | -1.013   | 0.312    | -0.442, 0.141                 |
| Time×Coaching×PCP×Meal×Buddy | -0.219   | -1.473   | 0.141    | -0.510, 0.073                 |

|                                     |               |               |              |                       |
|-------------------------------------|---------------|---------------|--------------|-----------------------|
| Time×Coaching×Text×Meal×Buddy       | -0.077        | -0.518        | 0.605        | -0.369, 0.215         |
| Time×PCP×Text×Meal×Buddy            | -0.011        | -0.077        | 0.939        | -0.304, 0.281         |
| Time×Coaching×PCP×Text×Meal×Buddy   | -0.130        | -0.875        | 0.382        | -0.422, 0.162         |
| <b>6-Months</b>                     |               |               |              |                       |
| Time                                | -4.841        | -22.284       | 0.000        | -5.268, -4.415        |
| Time×Coaching                       | 0.124         | 0.572         | 0.567        | -0.303, 0.551         |
| Time×PCP                            | -0.023        | -0.104        | 0.917        | -0.449, 0.404         |
| Time×Text                           | 0.084         | 0.387         | 0.699        | -0.343, 0.511         |
| Time×Meal                           | 0.108         | 0.498         | 0.619        | -0.319, 0.535         |
| <b>Time×Buddy</b>                   | <b>-0.435</b> | <b>-2.003</b> | <b>0.046</b> | <b>-0.862, -0.008</b> |
| Time×Coaching×PCP                   | -0.130        | -0.601        | 0.548        | -0.556, 0.296         |
| Time×Coaching×Text                  | -0.179        | -0.824        | 0.411        | -0.604, 0.247         |
| Time×Coaching×Meal                  | -0.096        | -0.444        | 0.657        | -0.522, 0.330         |
| Time×Coaching×Buddy                 | -0.085        | -0.394        | 0.694        | -0.511, 0.341         |
| Time×PCP×Text                       | -0.211        | -0.974        | 0.331        | -0.637, 0.215         |
| Time×PCP×Meal                       | 0.093         | 0.429         | 0.668        | -0.333, 0.519         |
| Time×PCP×Buddy                      | -0.276        | -1.273        | 0.204        | -0.702, 0.150         |
| Time×Text×Meal                      | 0.101         | 0.465         | 0.642        | -0.325, 0.527         |
| Text×Buddy                          | 0.217         | 1.003         | 0.316        | -0.208, 0.643         |
| Time×Meal×Buddy                     | 0.041         | 0.188         | 0.851        | -0.385, 0.467         |
| Time×Coaching×PCP×Text              | -0.074        | -0.342        | 0.733        | -0.500, 0.352         |
| Time×Coaching×PCP×Meal              | 0.362         | 1.6700        | 0.096        | -0.064, 0.788         |
| Time×Coaching×PCP×Buddy             | 0.090         | 0.413         | 0.680        | -0.336, 0.515         |
| Time×Coaching×Text×Meal             | -0.062        | -0.286        | 0.775        | -0.488, 0.364         |
| Time×Coaching×Text×Buddy            | 0.068         | 0.313         | 0.755        | -0.358, 0.494         |
| Time×Coaching×Meal×Buddy            | 0.008         | 0.035         | 0.972        | -0.418, 0.434         |
| Time×PCP×Text×Meal                  | -0.165        | -0.760        | 0.448        | -0.591, 0.261         |
| <b>Time×PCP×Text×Buddy</b>          | <b>0.424</b>  | <b>1.956</b>  | <b>0.051</b> | <b>-0.002, 0.850</b>  |
| Time×PCP×Meal×Buddy                 | 0.112         | 0.517         | 0.606        | -0.314, 0.538         |
| Time×Text×Meal×Buddy                | -0.186        | -0.856        | 0.392        | -0.612, 0.240         |
| Time×Coaching×PCP×Text×Meal         | 0.204         | 0.941         | 0.347        | -0.222, 0.630         |
| <b>Time×Coaching×PCP×Text×Buddy</b> | <b>-0.383</b> | <b>-1.769</b> | <b>0.078</b> | <b>-0.809, 0.042</b>  |
| <b>Time×Coaching×PCP×Meal×Buddy</b> | <b>-0.376</b> | <b>-1.736</b> | <b>0.083</b> | <b>-0.802, 0.050</b>  |
| Time×Coaching×Text×Meal×Buddy       | -0.171        | -0.790        | 0.430        | -0.597, 0.255         |
| Time×PCP×Text×Meal×Buddy            | -0.027        | -0.123        | 0.902        | -0.454, 0.400         |
| Time×Coaching×PCP×Text×Meal×Buddy   | -0.164        | -0.755        | 0.451        | -0.590, 0.262         |

<sup>0</sup>Main effects from coaching to buddy represent component effects at baseline (time zero) and therefore do not test the hypotheses of interest.

\*Important interactions ( $p < .10$ ) at 6 months are designated in bold.

Table S2: Mean weight change (kg) at 6 months by component (factor) level.

|                 | Estimate        | 95% Confidence Interval |                  |
|-----------------|-----------------|-------------------------|------------------|
|                 |                 | Lower Bound             | Upper Bound      |
| <b>Coaching</b> |                 |                         |                  |
| 12              | -4.96582        | -5.56895                | -4.36269         |
| 24              | -4.7171         | -5.321457               | -4.112736        |
| <b>PCP</b>      |                 |                         |                  |
| Off             | -4.8189         | -5.433222               | -4.204574        |
| On              | -4.86402        | -5.456996               | -4.27104         |
| <b>Texts</b>    |                 |                         |                  |
| Off             | -4.92546        | -5.53316                | -4.31775         |
| On              | -4.75746        | -5.357221               | -4.157702        |
| <b>Meal</b>     |                 |                         |                  |
| Off             | -4.94957        | -5.557619               | -4.341519        |
| On              | -4.73335        | -5.332758               | -4.133937        |
| <b>Buddy</b>    |                 |                         |                  |
| <b>Off</b>      | <b>-4.40618</b> | <b>-5.018361</b>        | <b>-3.793999</b> |
| <b>On</b>       | <b>-5.27674</b> | <b>-5.871927</b>        | <b>-4.681546</b> |

\*Factor designated in bold  $p < .05$ ; also see Tables 4 and S1

Figure S1: Opt-IN App Interface. App depicts personalized goals for diet and MVPA and shows traffic light colors to depict progress towards goals. Also shown are different colored ribbons signifying adherence “streaks” of varying lengths: i.e., number of consecutive days/weeks of entering diet data into the app or meeting MVPA goals.

Figure S2: Opt-IN Participant Online Dashboard. Allows users to link to app user instructions, information about diet and MVPA, setting SMART goals, and PDF lessons and homework to be used in conjunction with coaching calls.

Figure S3: Opt-IN Coach Dashboard. Allows coaches to view individual participant data, send texts/messages, and view sent texts/messages and accumulated ribbons.

Figure S4: Effect of *Buddy*×*Meal*×*PCP*×*Coaching* interaction on weight change (kg) at six months. Plots A and B (upper row) show weight change among those who received 12 calls; Plots C and D (lower row) show weight change among those who received 24 calls. Plots A and C on the left show weight change among those who received buddy training (as well as

meal replacements or no replacements, and PCP report or no PCP report). Plots B and D on the right show weight change among those who received no buddy training (as well as meal replacements or no replacements and PCP reports or no reports). Error bars depict the 95% confidence interval of each estimated mean. Abbreviations: BUDDY=Buddy training; PCP=Report sent to primary care provider; MEAL=meal replacements

Figure S5: Effect of *Buddy*×*PCP*×*Text*×*Coaching* interaction on weight change (kg) at six months. Plots A and B (upper row) show weight change among those who received 12 coaching calls; Plots C and D (lower row) show weight change among those who received 24 calls. Plots A and C on the left show weight change among those who received buddy training (as well as texts or no texts, and PCP report or no PCP report). Plots B and D on the right show weight change among those who received no buddy training with or without texts and PCP reports. Error bars depict the 95% confidence interval of each estimated mean. Abbreviations: BUDDY=Buddy training; PCP=Report sent to primary care provider; TEXT=text messaging

## Opt-IN App Interface

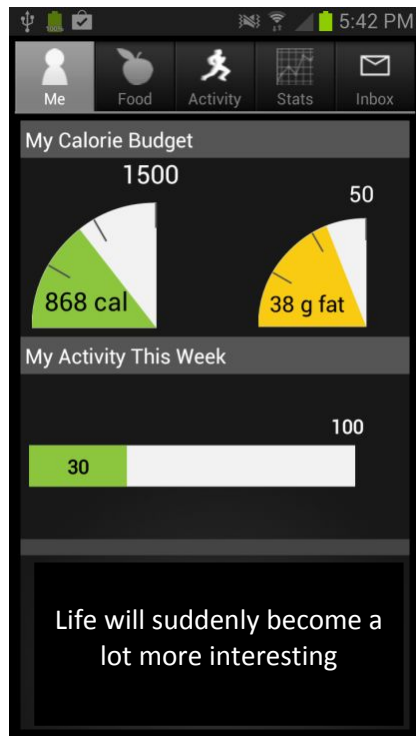

Daily calorie allowance (goal) is 1500, shown on larger left fan. Participant has consumed 868 calories. Calorie consumption is shown in green traffic light color, signifying that  $\geq 40\%$  of calorie allowance remains.

Daily saturated fat allowance (goal) is 50 g, shown in smaller right fan. Participant has consumed 38 g fat. Fat consumption is shown in yellow traffic light color, signifying that  $< 40\%$  of fat allowance remains. Red traffic light color would signify exceeding goal allowance.

Activity goal thermometer shows weekly MVPA goal = 100 min. Participant has accumulated 30 min, shown in green because 6 days remain to reach this week's 100 min goal.

Fortune is one of two alternative incentives participant can earn for entering a weight in the app. A joke is the other incentive.

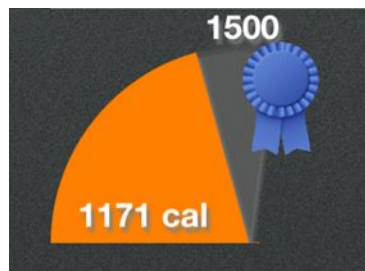

Ribbons of different colors are shown on the app to reward different durations of consistently successful adherence behavior ("streaks").

### Calorie Ribbon:

- Blue Ribbon → Entered food for 1-2 days
- Silver Ribbon → Entered food for 3-5 days
- Gold Ribbon → Entered food for 6-7 days

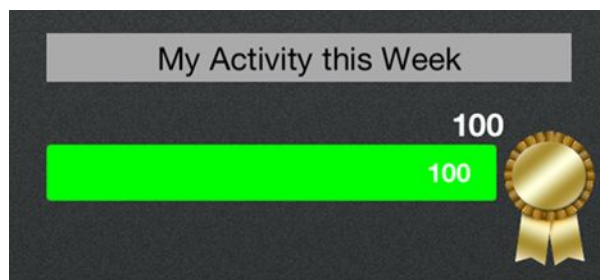

### Physical Activity Ribbon:

- Blue Ribbon → Met or exceeded PA goal for 1 week
- Silver Ribbon → Met or exceeded PA goal for 2 consecutive weeks
- Gold Ribbon → Met or exceeded PA goal for  $\geq 3$  consecutive weeks

Figure S1: Opt-IN App Interface. App depicts personalized goals for diet and MVPA and shows traffic light colors to depict progress towards goals. Also shown are different colored ribbons signifying adherence "streaks" of varying lengths: i.e., number of consecutive days/weeks of entering diet data into the app or meeting MVPA goals.

## Opt-IN Online Participant Dashboard

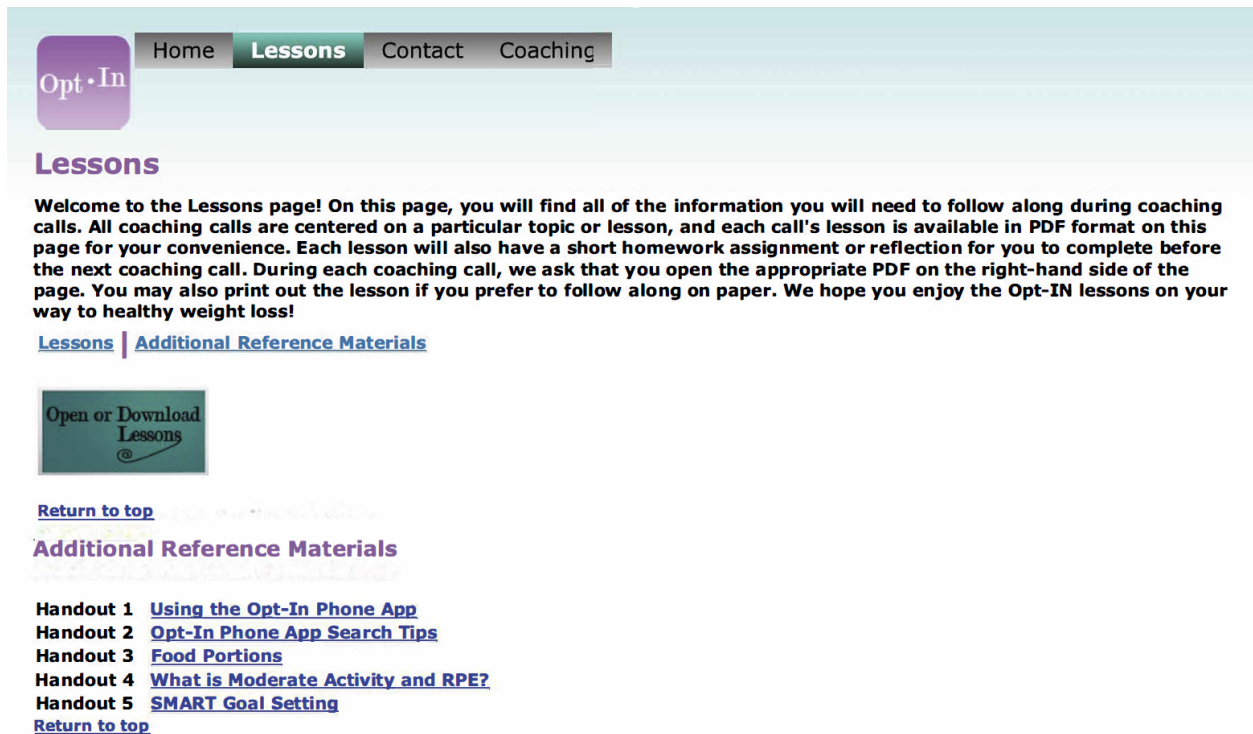

**Opt·In** Home **Lessons** Contact Coaching

## Lessons

Welcome to the Lessons page! On this page, you will find all of the information you will need to follow along during coaching calls. All coaching calls are centered on a particular topic or lesson, and each call's lesson is available in PDF format on this page for your convenience. Each lesson will also have a short homework assignment or reflection for you to complete before the next coaching call. During each coaching call, we ask that you open the appropriate PDF on the right-hand side of the page. You may also print out the lesson if you prefer to follow along on paper. We hope you enjoy the Opt-IN lessons on your way to healthy weight loss!

[Lessons](#) | [Additional Reference Materials](#)

Open or Download Lessons

[Return to top](#)

### Additional Reference Materials

[Handout 1 Using the Opt-In Phone App](#)  
[Handout 2 Opt-In Phone App Search Tips](#)  
[Handout 3 Food Portions](#)  
[Handout 4 What is Moderate Activity and RPE?](#)  
[Handout 5 SMART Goal Setting](#)

[Return to top](#)

Figure S2: Opt-IN Participant Online Dashboard. Allows users to link to app user instructions, information about diet and MVPA, setting SMART goals, and PDF lessons and homework to be used in conjunction with coaching calls.

### Opt-IN Coach Dashboard

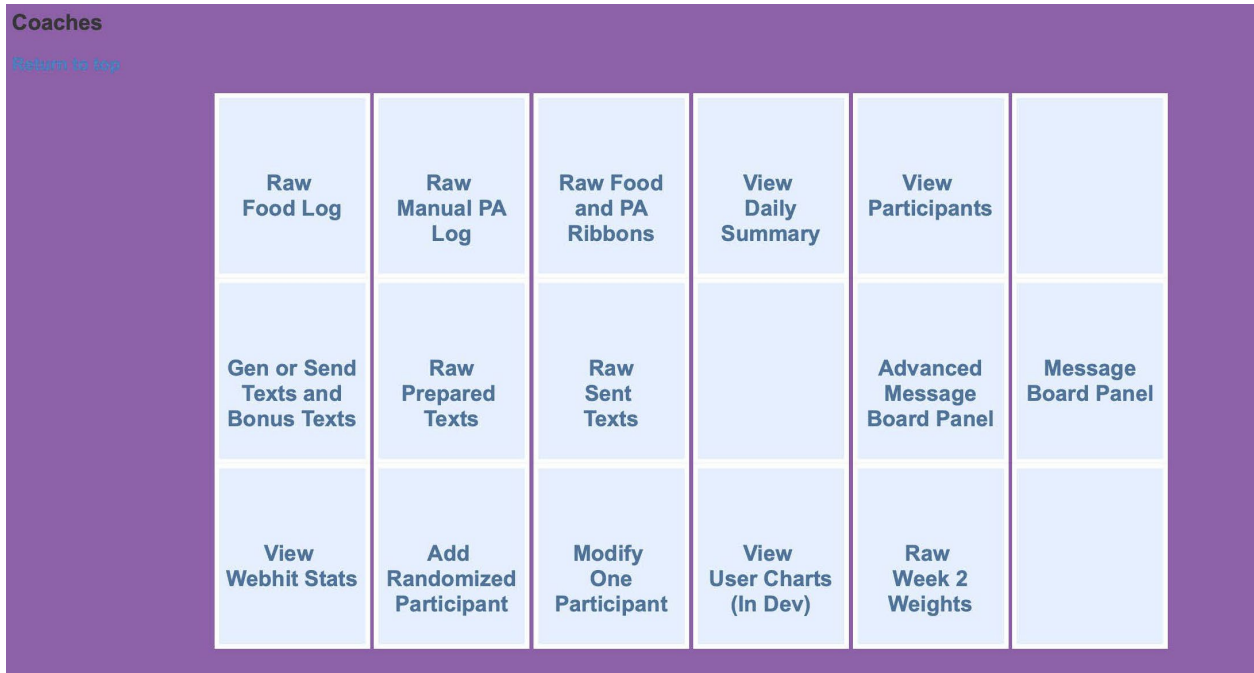

Figure S3: Opt-IN Coach Dashboard. Allows coaches to view individual participant data, send texts/messages, and view sent texts/messages and accumulated ribbons.



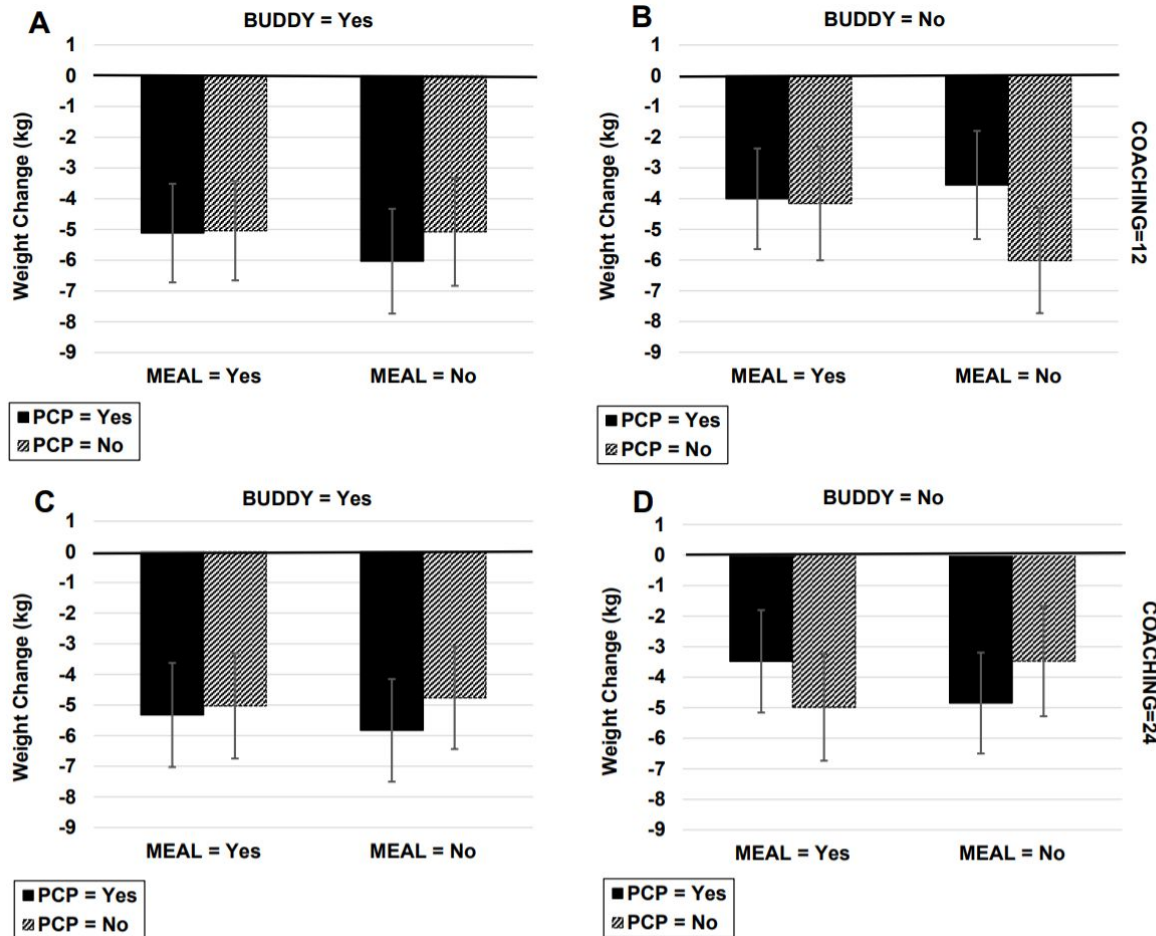

Figure S4. Effect of Buddy×Meal×PCP×Coaching interaction on weight change (kg) at six months. Plots A and B (upper row) show weight change among those who received 12 calls; Plots C and D (lower row) show weight change among those who received 24 calls. Plots A and C on the left show weight change among those who received buddy training (as well as meal replacements or no replacements, and PCP report or no PCP report). Plots B and D on the right show weight change among those who received no buddy training (as well as meal replacements or no replacements and PCP reports or no reports). Error bars depict the 95% confidence interval of each estimated mean. Abbreviations: BUDDY=Buddy training; PCP=Report sent to primary care provider; MEAL=meal replacements

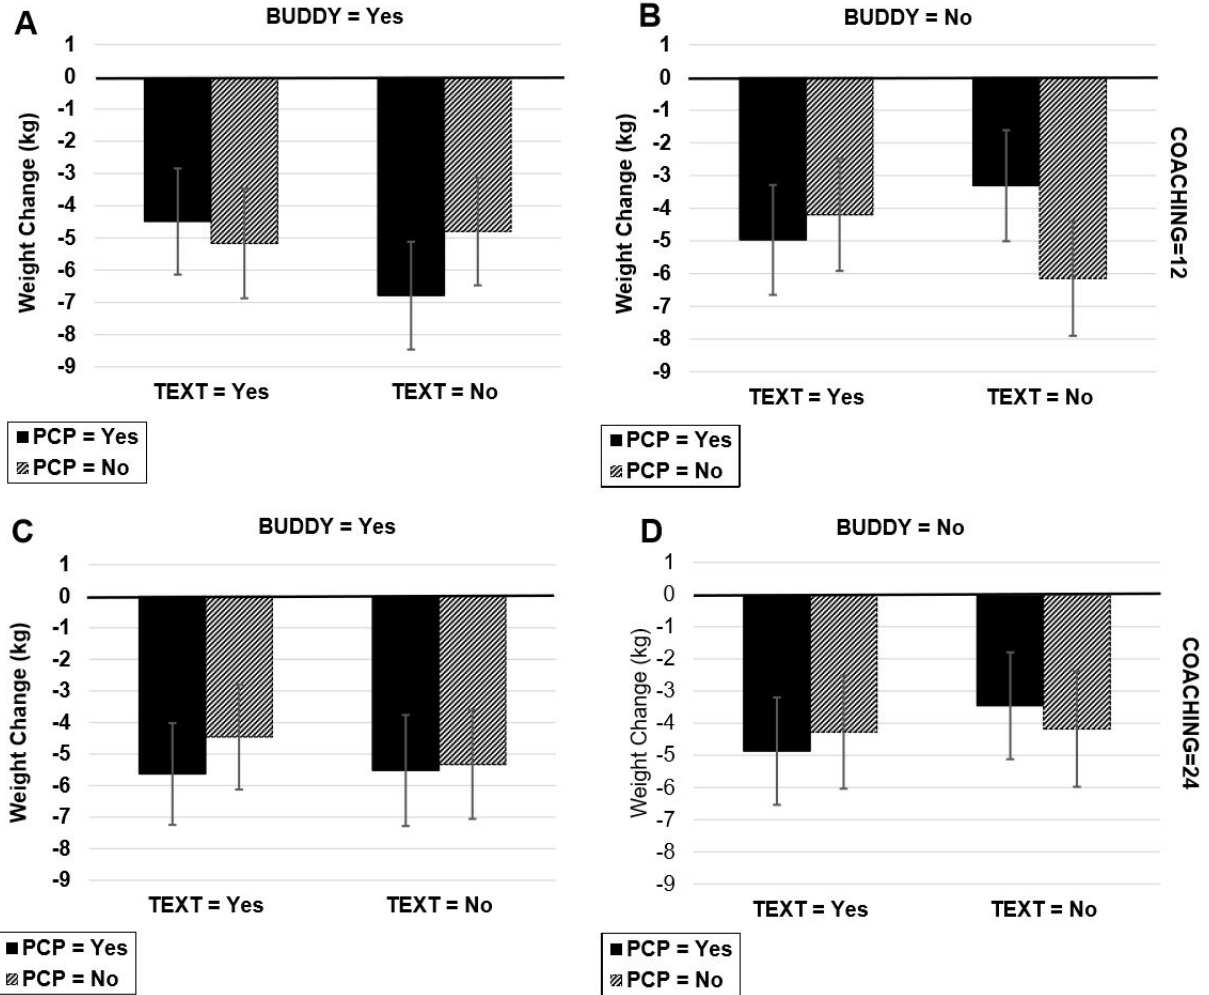

Figure S5. Effect of Buddy×PCP×Text×Coaching interaction on weight change (kg) at six months. Plots A and B (upper row) show weight change among those who received 12 coaching calls; Plots C and D (lower row) show weight change among those who received 24 calls. Plots A and C on the left show weight change among those who received buddy training (as well as texts or no texts, and PCP report or no PCP report). Plots B and D on the right show weight change among those who received no buddy training with or without texts and PCP reports. Error bars depict the 95% confidence interval of each estimated mean. Abbreviations: BUDDY=Buddy training; PCP=Report sent to primary care provider; TEXT=text messaging
